# Supplementary material for: Phase II Study of Iniparib with Concurrent Chemoradiation in Patients with Newly Diagnosed Glioblastoma
Source: Oxford University Press journal article supplement (doi:10.1158/1078-0432.ccr-18-0110), 2018-08-21
Supplement: 10780432ccr180110-sup-194276_2_supp_4781302_pd9cnh.docx [file 10780432ccr180110-sup-194276_2_supp_4781302_pd9cnh.docx]

Supplemental Table 1: grade 3 and 4 adverse events of all patients treated with at least one dose iniparib (N = 83).

| Adverse Events: N (%) | Grade 3 | Grade 4 | Total |
| --- | --- | --- | --- |
| Acute kidney injury | 1 (1) |  | 1 (1) |
| Alanine aminotransferase increased |  | 1 (1) | 1 (1) |
| Anemia | 2 (2) |  | 2 (2) |
| Aspartate aminotransferase increased |  | 1 (1) | 1 (1) |
| Atrial fibrillation | 1 (1) |  | 1 (1) |
| Bronchial infection | 1 (1) |  | 1 (1) |
| Cognitive disturbance | 1 (1) |  | 1 (1) |
| Confusion | 1 (1) |  | 1 (1) |
| Dehydration | 1 (1) |  | 1 (1) |
| Dizziness | 1 (1) |  | 1 (1) |
| Dysphasia | 1 (1) |  | 1 (1) |
| Fatigue | 4 (5) |  | 4 (5) |
| Flushing |  | 1 (1) | 1 (1) |
| Generalized muscle weakness | 2 (2) |  | 2 (2) |
| Headache | 1 (1) |  | 1 (1) |
| Hyperkalemia | 1 (1) |  | 1 (1) |
| Hypertension |  | 1 (1) | 1 (1) |
| Hypokalemia | 1 (1) |  | 1 (1) |
| Hypotension | 1 (1) |  | 1 (1) |
| Hypoxia | 1 (1) |  | 1 (1) |
| Lymphocyte count decreased | 4 (5) |  | 4 (5) |
| Nausea | 2 (2) |  | 2 (2) |
| Neutrophil Count Decreased | 3 (4) | 5 (6) | 8(10) |
| Platelet Count Decreased | 4 (5) | 11 (13) | 15 (18) |
| Rash maculo-papular | 3 (4) |  | 3 (4) |
| Skin and subcutaneous tissue disorders | 1 (1) |  | 1 (1) |
| Vomiting | 1 (1) |  | 1 (1) |
| White Blood Cell Decreased | 5 (6) | 3 (4) | 8 (10) |
